# Supplementary material
Source: publisher site journal article supplement (https://www.dovepress.com/article/264856)
Supplement: Supplementary file 1 [file get_supplementary_file.php]

**Table S1.** Twenty-nine variables selected for analysis and variables tested.

| **Variable** | **Variable definition** |
| --- | --- |
| Blood pressure | Categorical,60 ≤ DBP1 ≤ 90mmHg and 90 ≤ SBP1 ≤ 140mmHg vs. DBP or SBP not in the normal range |
| Sex | Categorical, male vs. female |
| Age | Categorical, ≤ 55 years old vs. > 55 years old |
| NEUT | Categorical, 0 vs. 1vs. 2 |
| LYMPH | Categorical, 0 vs. 1 vs. 2 |
| RBC | Categorical, 0 vs. 1 vs. 2 |
| HGB | Categorical, 0 vs. 1 vs. 2 |
| HCT | Categorical, 0 vs. 1 vs. 2 |
| PLT | Categorical, 0 vs. 1 vs. 2 |
| NLR | Categorical, ≥ 2.17 vs. < 2.17 |
| ALB | Categorical, 0 vs. 1 |
| GLO | Categorical, 0 vs. 1 vs. 2 |
| AGR | Categorical, < 1.64 vs. ≥ 1.64 |
| DBIL | Categorical, 0 vs. 1 vs. 2 |
| IBIL | Categorical, 0 vs. 1 vs. 2 |
| ALT | Categorical, 0 vs. 1 vs. 2 |
| AST | Categorical, 0 vs. 1 vs. 2 |
| BUN | Categorical, 0 vs. 1 vs. 2 |
| CRE | Categorical, 0 vs. 1 vs. 2 |
| UA | Categorical, 0 vs. 1 vs. 2 |
| PT **(sec)** | Categorical, 0 vs. 1 vs. 2 |
| PT-INR | Categorical, 0 vs. 1 vs. 2 |
| PT **(%)** | Categorical, 0 vs. 1 vs. 2 |
| APTT | Categorical, 0 vs. 1 vs. 2 |
| TT-SEC | Categorical, 0 vs. 1 vs. 2 |
| FIB **(g/l)** | Categorical, 0 vs. 1 vs. 2 |
| **Pathological** T | Categorical, Stage T1 & T2 vs. Stage T3 & T4 |
| **Pathological** N | Categorical, Stage N0 vs. Stage N1 |
| AJCC staging system | Categorical, Stage I & II vs. Stage III & IV |

*DBP: Diastolic blood pressure; SBP: systolic blood pressure; NEUT: absolute neutrophil count; LYMPH: absolute lymphocyte count; NLR: neutrophil-to-lymphocyte ratio; RBC: red blood cell count; HGB: hemoglobin; HCT: hematocrit value; PLT: platelet count; ALB: albumin; AGR: albumin to gamma-glutamyltransferase ratio; GLO: globulin; DBIL: direct bilirubin; IBIL: indirect bilirubin; ALT: alanine transaminase; AST: aspartate aminotransferase; BUN: blood urea nitrogen; CRE: creatinine; UA: uric acid; PT (second): plasma prothrombin time; PT-INR: international normalized ratio; PT (%): plasma prothrombin time activity; APTT: activated partial thromboplastin time; FIB (g/l): fibrinogen; TT (sec): thrombin time (second); 0: lower than the normal range; 1: normal range; 2: higher than the normal range.
